1 **Short Communication**

2 **17 $\alpha$ -ethynylestradiol (EE2) limits the impact of ibuprofen upon**  
3 **respiration by streambed biofilms in a sub-urban stream.**

4 Peter McClean<sup>1</sup>; William Ross Hunter<sup>1,2\*</sup>

5 <sup>1</sup>University of Ulster, School of Geography and Environmental Science, Coleraine,  
6 BT52 1SA, United Kingdom.

7 <sup>2</sup>Northern Ireland Agri-Food and Bioscience Institute, Fisheries and Aquatic  
8 Ecosystems Branch, Belfast, BT9 5PX, United Kingdom.

9 \*Corresponding author. Email: w.hunter@ulster.ac.uk

10

11

12

13

14 **Running Head: EE2 limits impact of ibuprofen on biofilm respiration**

15

16 **Title: 17 $\alpha$ -Ethinylestradiol (EE2) limits the impact of ibuprofen**  
17 **upon respiration by streambed biofilms in a sub-urban stream.**

18

19 **Abstract**

20 Pharmaceutical compounds such as the non-steroidal anti-inflammatory drug  
21 ibuprofen and the artificial estrogen 17 $\alpha$ -ethinylestradiol (EE2) are contaminants of  
22 emerging concern in freshwater systems. Globally, human pharmaceutical use is  
23 growing by around ~3 % per year, yet we know little about how interactions between  
24 different pharmaceuticals may affect aquatic ecosystems. Here we test how  
25 interactions between ibuprofen and EE2 affect the growth and respiration of  
26 streambed biofilms. We used contaminant exposure experiments to quantify how  
27 these compounds affected biofilm growth (biomass), respiration, net primary  
28 production (NPP) and gross primary production (GPP), both individually and in  
29 combination. We found no effects of either ibuprofen or EE2 on biofilm biomass  
30 (using ash free dry mass as a proxy) or gross primary production. Ibuprofen  
31 significantly reduced biofilm respiration and altered NPP. Concomitant exposure to  
32 EE2, however, counteracted the inhibitory effects of ibuprofen upon biofilm  
33 respiration. Our study, thus, demonstrates that interactions between pharmaceuticals  
34 in the environment may have complex effects upon microbial contributions to aquatic  
35 ecosystem functioning.

36

37 **Key Words**

38 17 $\alpha$ -ethinylestradiol; Biofilm; EE2; Ibuprofen; Microbial Metabolism;  
39 Pharmaceuticals and Personal Care products

40

41

## 42 **1. Introduction**

43 Human pharmaceuticals and personal care products (PPCPs) are contaminants of  
44 emerging concern within the environment (Rosi-Marshall and Royer 2012; Gaston et  
45 al. 2019). Since the year 2000, pharmaceutical use has grown by approximately 3%  
46 per year globally and this is predicted to increase further as human populations grow  
47 (Van Broeckel et al. 2014). Removal of PPCPs via waste-water treatment plants  
48 (WWTPs) is inefficient leading to the constant release of low doses of compounds  
49 such as non-steroidal anti-inflammatory drugs (NSAIDs) (e.g. ibuprofen),  
50 antimicrobial compounds (e.g. triclosan, and trimethoprim) and artificial estrogens  
51 (e.g. 17 $\alpha$ -ethynylestradiol) into the aquatic environment (Gros et al. 2007; Álvarez-  
52 Muñoz et al. 2015; Archer et al. 2017). This is potentially problematic because these  
53 compounds are specifically designed specifically to produce physiological effects  
54 within an organism, at ultra-low (nano-molar) concentrations (Rosi-Marshall and  
55 Royer, 2012; Van Broeckel et al. 2014; Álvarez-Muñoz et al. 2015). Eco-toxicological  
56 studies reveal that PPCPs at environmental concentrations can have significant  
57 physiological effects on both aquatic fauna and microorganisms, with the potential to  
58 disrupt aquatic ecosystem functioning altering carbon and nutrient cycling, and  
59 negatively affect water quality (Jobling et al. 2003; Hernando et al. 2006; Rosi-  
60 Marshall et al. 2013; Drury et al. 2013; Žur et al. 2018; Gallagher and Reisinger,  
61 2020).

62 In headwater streams, aquatic biofilms attached to the streambed represent the  
63 dominant mode of microbial life Besemer et al. 2012; Battin et al. 2016). Biofilms,  
64 composed of consortia of bacteria and unicellular eukaryotic algae bound within a  
65 complex matrix of extracellular polymeric substances (EPS), play a key role in the  
66 functioning of fluvial ecosystems, controlling both the transport and degradation of  
67 organic matter within a stream (Battin et al. 2016). Rosi-Marshall et al. (2013)  
68 revealed that aquatic PPCPs such as caffeine, cimetidine, ciprofloxacin,  
69 diphenhydramine, metformin and ranitidine had negative effects upon biofilm growth,  
70 respiration, and community composition. PPCPs, however, are diverse group of  
71 chemicals, which may interact with each other in a multitude of different, and often-  
72 unexpected ways (Rosi-Marshall et al. 2013; Gerbersdorf et al. 2015; Gaston et al.  
73 2019; Robson et al., 2020). Consequently, a mechanistic understanding of the

74 interactions between different PPCPs is needed if we are to fully understand their  
75 environmental impacts.

76 Within the broad spectrum of PPCPs the non-steroidal anti-inflammatories (NSAIDs),  
77 such as ibuprofen, and artificial estrogens, such as 17 $\alpha$ -ethynylestradiol, represent  
78 some of the most commonly detected compounds in aquatic systems (Álvarez-  
79 Muñoz et al. 2015; Gaston et al. 2019). NSAIDs are known to have antimicrobial  
80 properties, with ibuprofen exhibiting potential as a biofilm control agent (Reśliński et  
81 al. 2015; Shah et al. 2018; Żur et al. 2018; Oliveira et al. 2019). Conversely, artificial  
82 estrogens and other endocrine disruptors may adsorb onto microbial biofilms  
83 facilitating their biological degradation (Writer et al. 2012; Zhang et al. 2014; Adeel et  
84 al. 2017). There are currently no known therapeutic interactions between NSAIDs  
85 and artificial estrogens in animal systems. The fact that these compounds elicit  
86 different microbial responses, however, suggests there may be potential for  
87 interactions between NSAIDs and artificial estrogens to affect the growth and  
88 metabolism of aquatic microorganisms. Here we present the first data on how  
89 interactions between ibuprofen and 17 $\alpha$ -ethynylestradiol (hereafter, EE2) affect the  
90 growth and respiration of streambed biofilms. *We conducted in situ* contaminant  
91 exposure experiments, following Costello et al. (2016), to test how chronic exposure  
92 to ibuprofen, and EE2, both individually and in combination, affected streambed  
93 biofilm growth, primary production and respiration.

## 94 **2. Materials and Methods**

95 All experiments were carried out between the 30<sup>th</sup> November 2018 and the 22<sup>nd</sup>  
96 January 2019 in the Ballysally Blagh (Latitude: 55°08'45.1"N Longitude:  
97 6°40'18.0"W), a ground-water fed second-order stream. The Ballysally Blagh is a  
98 tributary of the lower River Bann (Northern Ireland), draining a mixed agricultural  
99 (consisting of 21.9 % arable; 55.9 % grassland; 13.7 % heathland; 1.9 % woodland)  
100 and urban (7.3 %) catchment of 14.2 km<sup>2</sup>. The mean volumetric rate for water flow in  
101 the Ballysally Blagh is 0.21 ( $\pm$  0.27) m<sup>3</sup> s<sup>-1</sup>, measured at a V-shaped weir (National  
102 River Flow Archive. 2019) and the stream is defined as eutrophic, with dissolved  
103 nitrate concentrations ranging between 1.37 and 14.15 mg.l<sup>-1</sup> and soluble reactive  
104 phosphorus concentrations between 0.033 and 0.4 mg.l<sup>-1</sup>. Water temperature at the  
105 study site was recorded at 1-hour intervals throughout the experiment using a HOBO

106 MX2204 Bluetooth temperature logger. Temperatures ranged between 9.35 °C and  
107 5.16 °C, with a mean temperature of 7.72 ( $\pm$  0.85) °C recorded over the study period.

108 Contaminant exposure experiments were conducted following Costello et al. (2016).  
109 Briefly, forty 120 ml screw cap sample pots were filled with 2 % agar, of which ten  
110 were spiked with a fixed 0.5 mmol.l<sup>-1</sup> concentration of ibuprofen, ten with a fixed 0.5  
111 mmol.l<sup>-1</sup> concentration of EE2, ten spiked with fixed 0.5 mmol.l<sup>-1</sup> concentrations of  
112 both ibuprofen and EE2, and ten received no pharmaceutical treatment (control).  
113 Both ibuprofen and EE2 have relatively low solubility in water (21 mg.l<sup>-1</sup> and 3.6 mg.l<sup>-1</sup>  
114 respectively). As such, stock solutions for each pharmaceutical treatment were  
115 made up by dissolving 159 mg of ibuprofen (Sigma-Aldrich, Product No. I4883), 105  
116 mg of EE2 (Sigma-Aldrich, Product No. E4876) or both in 11 ml of 70 % ethanol. 1  
117 ml aliquots of the stock solution were then used to dose each contaminant exposure  
118 experiment and the control treatments receiving a 1 ml aliquot of 70 % ethanol. Pre-  
119 combusted Whatman® 45 mm GF/F filters were placed onto of the solid agar and  
120 secured using the screw cap, to provide a substratum for streambed biofilm  
121 colonization. Contaminant exposure experiments were then secured to four L-  
122 shaped metal bars ( $l = 1000$  mm;  $w = 50$  mm;  $d = 50$  mm) and deployed at 10 cm  
123 depth, in an area of turbulent flow (riffle) within the stream.

124 Environmental chambers were assembled from two Curry's Essentials® C61CF13  
125 chest freezers, with the power source re-routed through Inkbird ITC-308 Digital  
126 Temperature Controller used to override the freezers internal thermostat. A single  
127 Tetra HT50 (50 Watt) aquarium heater was also attached to the Inkbird temperature  
128 controller of each unit to help stabilise the internal temperature. Two NICREW  
129 planted aquarium LED strip lights were attached to the lid, providing a source of  
130 photosynthetically active radiation ( $- 106.0 \mu\text{mol m}^{-2} \text{s}^{-1}$ , measured using an Apogee  
131 Instruments Photosynthetically Active Radiation Meter). Environmental chambers  
132 were filled with 20 l of streamwater and the internal temperatures set to 7.7 °C. The  
133 contaminant exposure experiments were left *in situ* for 54 days, after which they  
134 were recovered from the stream, directly placed into one of the environmental  
135 chambers and allowed to acclimate over 24 hours. During the acclimation period  
136 each mesocosm was aerated using a Aqualine Hailea Aco-9630.

137 After the acclimation period, biofilm respiration and gross primary production were  
138 determined by changes in oxygen consumption by enclosing each contaminant

139 exposure experiment into a sealed transparent Perspex® push core (height = 30 cm,  
140 internal diameter = 7 cm) chambers, containing 1 litre of sterile-filtered streamwater  
141 and held at 7.7 °C in one of the environmental chambers (Bott et al. 1978; Fellows et  
142 al. 2006). Biofilm respiration (R) were quantified by measuring the change in oxygen  
143 concentrations over a one-hour period (oxygen consumption in darkness (PAR ~ 0.0  
144  $\mu\text{mol m}^{-2} \text{s}^{-1}$ ) using a Hach Sension 6 dissolved oxygen meter. Biofilm net primary  
145 productivity (NPP) was then quantified by measuring the change in oxygen  
146 concentration over a one 1-hour period, under artificial illumination (PAR ~ 106.0  
147  $\mu\text{mol m}^{-2} \text{s}^{-1}$ ). Biofilm gross primary productivity (GPP) by the biofilms was then  
148 calculated from NPP and R as:

149 [1] 
$$\text{GPP} = \text{NPP} - \text{R}$$

150 In cases where NPP was more negative than R (indicating greater oxygen  
151 consumption under artificial illumination) the baseline for GPP defaulted to zero.

152 Microbial biomass within each Contaminant Exposure Experiment was quantified as  
153 Ash Free Dry Mass of the GF/F filters. These were dried for 48 hours at 65 °C and  
154 then subsequently combusted at 550 °C for 2 hours. We estimated the daily dose of  
155 the pharmaceuticals delivered within each treatment following Costello et al. (2016),  
156 assuming that ibuprofen and EE2 doses were proportional to the agar mass lost.

157 All data are available in the supplementary information. Data analyses were  
158 conducted in the R statistical computing environment using the *base* and *ggplot2*  
159 packages (R Development Core Team. 2009; Wickham, 2016). We tested for  
160 independent and combined effects of ibuprofen and EE2 upon microbial biomass  
161 (Ash Free Dry Weight), Respiration and NPP and GPP using two-way analysis of  
162 variance (ANOVA). Post-hoc testing of significant interactions was conducted using  
163 Tukey's test for Honest Significant Difference. All data were visually explored, to  
164 ensure they conformed to the assumptions of normality and homoscedacity,  
165 following Zuur et al. (2010). Microbial biomass data were  $\log_{10}$  transformed to ensure  
166 the residuals of the ANOVA model conformed to a normal distribution.

### 167 **3. Results**

168 Using ash free dry mass as a proxy for microbial biomass we detected no significant  
169 effects ( $p > 0.05$ ) of pharmaceutical exposure upon microbial biofilm growth (Fig 1 A;  
170 Table 1 a). We detected a significant interaction ( $p < 0.001_{df = 1; F = 18.75}$ ) between

171 ibuprofen and EE2 affecting microbial respiration (Fig 1 B; Table 1 b). Exposure to  
172 ibuprofen alone inhibited microbial oxygen consumption by ~ 38 %, whilst exposure  
173 to EE2 alone resulted in a slight (non-significant) increase in oxygen consumption of  
174 ~ 5 %. In combination, EE2 counteracted the inhibitory effect of ibuprofen upon of  
175 microbial respiration, resulting in no significant change in respiration relative to the  
176 control. Biofilm NPP was negative in all treatments, with ibuprofen exposure resulting  
177 in a significant decrease in oxygen consumption ( $p = 0.009_{df = 1; F = 7.483}$ ), reflecting the  
178 effect on biofilm respiration (Fig 1 C; Table 1 c). Across all treatments GPP was  
179 close to zero, with no significant effects ( $p > 0.05$ ) of either ibuprofen or EE2 We did,  
180 however, detect a non-significant increase in oxygen production by biofilms exposed  
181 to both ibuprofen and GPP (Fig 1 D; Table 1 d).

#### 182 **4. Discussion**

183 Our study demonstrates that interactions between the NSAID ibuprofen and the  
184 artificial estrogen EE2 have a significant effect upon the streambed biofilm  
185 respiration. Specifically, concomitant exposure to both ibuprofen and EE2 reduced  
186 the depressive effect of ibuprofen upon biofilm respiration. Ibuprofen is known to  
187 have antimicrobial properties and has been reported to inhibit biofilm formation by  
188 both *Staphylococcus aureus* and *Escherichia coli* (Reśliński et al. 2015; Shah et al.  
189 2018; Oliviera et al. 2019). It is, therefore, unsurprising that ibuprofen inhibited  
190 microbial respiration within the streambed biofilms. EE2 has been observed to  
191 adsorb to microbial biofilms (Writer et al. 2012) where it can then be used by the  
192 resident microorganisms as an organic matter source Stumpe et al. 2009; Ribeiro et  
193 al. 2010). Consequently, biofilms have been proposed as a tool for the removal of  
194 artificial estrogens and other endocrine disruptors within wastewater treatment  
195 facilities (Pieper and Rotard, 2011). The presence of EE2 as an energy source may,  
196 therefore, counteract the inhibitory effects of ibuprofen (Combalbert et al., 2010),  
197 whilst sorption of EE2 to the biofilm matrix may protect the microbial cells by  
198 reducing the space available onto which ibuprofen molecules may bind (Writer et al.  
199 2012; Zhang et al. 2014). These mechanisms, however, remain speculative and  
200 require further investigation within controlled laboratory experiments.

201 The negative NPP within the experiment suggests that our biofilms were  
202 heterotrophic, relying on organic matter from the surrounding environment to provide  
203 energy and nutrients for biofilm growth. The significant effects of ibuprofen upon

204 NPP, therefore, provide further evidence of this specific PPCP inhibits heterotrophic  
205 metabolism in streambed biofilms. Autotrophic activity was low, within our study,  
206 limiting our ability to infer how either ibuprofen or EE2 affects the algal component  
207 within our biofilms. Nevertheless, the non-significant increase in GPP within biofilms  
208 exposed to both pharmaceuticals further suggests that EE2 may mediate microbial  
209 responses to ibuprofen exposure. This experiment was, however, conducted during the  
210 winter, when algal growth within streambed biofilms is typically low (e.g. Duncan and  
211 Blinn, 1989; Francoeur et al., 1999). To adequately test how interactions between  
212 ibuprofen and EE2 affect autotrophic biofilms, requires repetition of the study during  
213 spring or summer, when longer day length is likely to promote higher algal growth at  
214 the streambed.

215 Given ibuprofen's potential as a biofilm control agent (Reśliński et al. 2015; Shah et  
216 al. 2018; Žur et al. 2018; Oliveira et al. 2019), we were surprised to observe that it  
217 had no effect upon biofilm biomass within our experiments. This, however, may  
218 reflect the development of microbial resistance to anthropogenic stressors such as  
219 pharmaceuticals in agricultural and urban catchments to (e.g. Drury et al., 2013; Cai  
220 et al., 2016; Qu et al., 2017; Roberto et al. 2018). Furthermore, siltation of fine  
221 particulate matter may affect the accuracy of ash free dry mass as a measure of  
222 biomass in urban and agricultural streams. This leads us to suggest that  
223 complementary analysis of specific microbial biomarkers, such as polar lipid fatty  
224 acids (Middelburg et al. 2000; Frostegård et al., 2010; Hunter et al., 2012, 2013) and  
225 extracellular polysaccharide quantification (Fish et al., 2017; Grzegorzczak et al.,  
226 2018) may provide further insight into how these pharmaceuticals may affect biofilm  
227 biomass and structure.

228 Within this short paper we demonstrate that interactions between NSAIDs and  
229 artificial estrogens could have important implications for aquatic ecosystem  
230 functioning during the winter, when lower water temperatures limit microbial activity  
231 within streambed biofilms (Ylla et al. 2012). Whilst the doses of ibuprofen and EE2  
232 within our study appear high, they are broadly comparable with doses used in many  
233 other contaminant exposure experiments (Drury et al., 2013; Rosi-Marshall et al.  
234 2013, Rosi et al., 2018; Gallagher and Reisinger 2020). Our experiment, thus,  
235 provides a reasonably realistic insight into how interactions between these two  
236 PPCPs affect aquatic microbial activity.



237 Our study supports a growing body of evidence suggesting that PPCPs represent a  
238 major threat to ecosystem functioning in many streams and rivers (Jobling et al.  
239 2003; Hernando et al. 2006; Gros et al. 2007; Rosi-Marshall and Royer, 2012; Rosi-  
240 Marshall et al. 2013; Álvarez-Muñoz et al. 2015; Ruhí et al. 2016; Archer et al 2017).  
241 Interactions between PPCPs and their effects within the environment are potentially  
242 complex and mediated by changes in environmental context (Rosi-Marshall et al.  
243 2013; Rosi et al., 2018 Gallagher and Reisinger, 2020). Future studies need to  
244 investigate how the interactions between different PPCPs affect aquatic microbial  
245 communities under different regimes of temperature, aquatic chemistry and  
246 ecological community structure. This demands the design of field-based contaminant  
247 exposure experiments that test the interactions between a range of PPCPs both  
248 within and between freshwater catchments. Here, we also highlight the need to  
249 identify what underlying biochemical mechanisms determine how interactions  
250 between different PPCPs affect aquatic microbial processes.

## 251 **5. Acknowledgments**

252 This work was completed by PMcC during his final year undergraduate research  
253 project, supervised by WRH. It was funded through start-up funds provided to WRH  
254 by the University of Ulster's School of Geography and Environmental Science. We  
255 acknowledge fieldwork assistance by Ashley Williamson, and technical support in the  
256 lab from Peter Devlin and Hugo McGrogan.

257 **Conflicts of Interest:** The authors declare no conflicts of interest relating to this  
258 study.

259 **Data Accessibility.** All data related to this publication are available as a  
260 supplementary data file alongside this paper.

261

262 **6. References**

- 263 Adeel M, Song S, Wang Y, Francis D, Yang Y. (2017) Environmental impact of  
264 oestrogens on human, animal and plant life: A critical review. *Environment*  
265 *International* 99:107-119.
- 266 Álvarez-Muñoz D, Rodríguez-Mozaz S, Maulvault AL, Tediosi A, Fernández-Tejedor  
267 M, Van den Heuvel F, Kotterman M, Marques A, Barceló D. (2015) Occurrence of  
268 pharmaceuticals and endocrine disrupting compounds in macroalgae, bivalves, and  
269 fish from coastal areas in Europe. *Environmental Research* 143:56-64.
- 270 Archer E, Petrie B, Kasprzyk-Hordern B, Wolfaardt GM. (2017) The fate of  
271 pharmaceuticals and personal care products (PPCPs), endocrine disrupting  
272 contaminants (EDCs), metabolites and illicit drugs in a WWTW and environmental  
273 waters. *Chemosphere* 174:437-446.
- 274 Battin TJ, Besemer K, Bengtsson MM, Romani AM, Packmann AI. (2016) The  
275 ecology and biogeochemistry of stream biofilms. *Nature Reviews Microbiology*  
276 14:251-263.
- 277 Besemer K, Peter H, Logue JB, Langenheder S, Lindstrom ES, Tranvik LJ, Battin TJ.  
278 (2012) Unraveling assembly of stream biofilm communities. *ISME Journal* 6:1459-  
279 1468.
- 280 Bott TL, Brock JT, Cushing CE, S. V. Gregory SV, King D, Petersen RC. (1978) A  
281 comparison of methods for measuring primary productivity and community  
282 respiration in streams. *Hydrobiologia* 60:3-12.

- 283 Cai W, Li Y, Wang P, Niu L, Zhang W, Wang C (2016). Revealing the relationship  
284 between microbial community structure in natural biofilms and the pollution level in  
285 urban rivers: a case study in the Qinhuai River basin, Yangtze River Delta. *Water*  
286 *Science and Technology* 74:1163–1176. DOI: [10.2166/wst.2016.224](https://doi.org/10.2166/wst.2016.224).
- 287 Combalbert S, Hernandez-Raquet G. (2010) Occurrence, fate, and biodegradation of  
288 estrogens in sewage and manure. *Applied Microbiology and Biotechnology* 86:1671–  
289 1692. DOI: 10.1007/s00253-010-2547-x.
- 290 Costello DM, Rosi-Marshall EJ, Shaw LE, Grace M, Kelly JJ. (2016) A novel method  
291 to assess effects of chemical stressors on natural biofilm structure and function.  
292 *Freshwater Biology* 61:2129-2140. DOI: 10.1111/fwb.12541
- 293 Drury B, Scott J, Rosi-Marshall EJK, J.J. (2013) Triclosan Exposure Increases  
294 Triclosan Resistance and Influences Taxonomic Composition of Benthic Bacterial  
295 Communities. *Environmental Science and Technology* 47:8923-8930.
- 296 Duncan SW, Blinn DW. (1989) Importance of physical variables on the seasonal  
297 dynamics of epilithic algae in a highly shaded canyon stream. *Journal of Phycology*  
298 25:455-461. doi:[10.1111/j.1529-8817.1989.tb00250.x](https://doi.org/10.1111/j.1529-8817.1989.tb00250.x)
- 299 Fellows CS, Clapcott JE, Udy JW, Bunn SE, Harch BD, Smith MJ, Davies PM.  
300 (2006) Benthic Metabolism as an Indicator of Stream Ecosystem Health.  
301 *Hydrobiologia* 572:71-87.
- 302 Fish K, Osborn AM, Boxall JB. (2017) Biofilm structures (EPS and bacterial  
303 communities) in drinking water distribution systems are conditioned by hydraulics  
304 and influence discolouration. *Science of The Total Environment* 593-594:571-580.

- 305 Francoeur SN, Biggs BJF, Smith RA, Lowe RL. (1999) Nutrient Limitation of Algal  
306 Biomass Accrual in Streams: Seasonal Patterns and a Comparison of Methods.  
307 *Journal of the North American Benthological Society* 18 (2):242-260
- 308 Frostegård A, Tunlid A, Bååth E. (2011) Use and misuse of PLFA measurements in  
309 soils. *Soil Biology and Biochemistry*. 43:1621-1625.
- 310 Gallagher MT, Reisinger AJ. (2020) Effects of ciprofloxacin on metabolic activity and  
311 algal biomass of urban stream biofilms. *Science of the Total Environment*  
312 706:135728. DOI: 10.1016/j.scitotenv.2019.135728.
- 313 Gaston L, Lapworth DJ, Stuart M, Arnscheidt J. (2019) Prioritization Approaches for  
314 Substances of Emerging Concern in Groundwater: A Critical Review. *Environmental*  
315 *Science & Technology* 53:6107-6122.
- 316 Gerbersdorf SU, Cimadoribus C, Class H, Engesser K-, Helbich S, Hollert H, Lange  
317 C, Kranert M, Metzger J, Nowak W, Seiler T-, Steger K, Steinmetz H, Wieprecht S.  
318 (2015) Anthropogenic Trace Compounds (ATCs) in aquatic habitats: Research  
319 needs on sources, fate, detection and toxicity to ensure timely elimination strategies  
320 and risk management. *Environment International* 79:85-105.
- 321 Gros M, Petrović M, Barcelo D. (2007) Wastewater treatment plants as a pathway for  
322 aquatic contamination by pharmaceuticals in the Ebro river basin (northeast Spain).  
323 *Environmental Toxicology and Chemistry* 26:1553-1562.
- 324 Grzegorzczuk M, Pogorzelski SJ, Pospiech A, Boniewicz-Szmyt K. (2018) Monitoring  
325 of Marine Biofilm Formation Dynamics at Submerged Solid Surfaces With  
326 Multitechnique Sensors. *Frontiers in Marine Science* 5:363.

- 327 Hernando MD, Mezcua M, Fernández-Alba AR, Barceló D. (2006) Environmental  
328 risk assessment of pharmaceutical residues in wastewater effluents, surface waters  
329 and sediments. *Talanta* 69:334-342.
- 330 Hunter WR, Jamieson A, Huvenne VAI, Witte U. (2013) Sediment community  
331 responses to marine vs. terrigenous organic matter in a submarine canyon.  
332 *Biogeosciences*. 10:67-80.
- 333 Hunter WR, Veuger B, Witte U. (2012) Macrofauna regulate heterotrophic bacterial  
334 carbon and nitrogen incorporation in low-oxygen sediments. *ISME Journal* 6:2140-  
335 2151.
- 336 Jobling S, Casey D, Rodgers-Gray T, Oehlmann J, Schulte-Oehlmann U, Pawlowski  
337 S, Baunbeck T, Turner AP, Tyler CR. (2003) Comparative responses of molluscs  
338 and fish to environmental estrogens and an estrogenic effluent. *Aquatic Toxicology*  
339 65:205-220.
- 340 Middelburg JJ, Barranguet C, Boschker HTS, Herman PMJ, Moens T, Heip CHR.  
341 (2000) The fate of intertidal microphytobenthos carbon: An in situ <sup>13</sup>C-labeling study.  
342 *Limnology and Oceanography*. 45:1224-1234.
- 343 National River Flow Archive. (2019) Station 203050: Ballysally Blagh at University of  
344 Ulster. <https://nrfa.ceh.ac.uk/data/station/spatial/203050>.
- 345 Pieper C, Rotard W. (2011) Investigation on the removal of natural and synthetic  
346 estrogens using biofilms in continuous flow biofilm reactors and batch experiments  
347 analysed by gas chromatography/mass spectrometry. *Water Research* 45:1105-  
348 1114.

- 349 Oliveira IM, Borges A, Borges F, Simões M. (2019) Repurposing ibuprofen to control  
350 *Staphylococcus aureus* biofilms. *European Journal of Medicinal Chemistry* 166:197-  
351 205.
- 352 Qu X, Ren Z, Zhang H, *et al.* (2017). Influences of anthropogenic land use on  
353 microbial community structure and functional potentials of stream benthic  
354 biofilms. *Scientific Reports* 7:15117. <https://doi.org/10.1038/s41598-017-15624-x>
- 355 R Development Core Team. (2009) R: A language and environment for statistical  
356 computing.
- 357 Reśliński A, Dąbrowiecki S, Głowacka K. (2015) The impact of diclofenac and  
358 ibuprofen on biofilm formation on the surface of polypropylene mesh. *Hernia* 19:179-  
359 185.
- 360 Ribeiro AR, Carvalho MF, Afonso CMM, Tiritan ME, Castro PML. (2010) Microbial  
361 degradation of 17 $\beta$  -estradiol and 17 $\alpha$  -ethinylestradiol followed by a validated  
362 HPLC-DAD method. *Journal of Environmental Science and Health, Part B* 45:265-  
363 273.
- 364 Roberto AA, Van Gray JB, Leff L. (2018) Sediment bacteria in an urban stream:  
365 Spatiotemporal patterns in community composition. *Water Research* 134:359-369.
- 366 Robson, SV, Rosi EJ, Richmond EK, Grace MR (2020). Environmental  
367 concentrations of pharmaceuticals alter metabolism, denitrification, and diatom  
368 assemblages in artificial streams. *Freshwater Science*. DOI: 10.1086/708893.

- 369 Rosi EJ, Bechtold HA, Snow D, Rojas M, Reisinger AJ, Kelly JJ. (2018) Urban  
370 stream microbial communities show resistance to pharmaceutical exposure.  
371 *Ecosphere* 9:e02041.
- 372 Rosi-Marshall EJ, Kincaid DWL, Bechtold H, Royer TV, Rojas M, Kelly JJ. (2013)  
373 Pharmaceuticals suppress algal growth and microbial respiration and alter bacterial  
374 communities in stream biofilms. *Ecological Applications* 23:583-593.
- 375 Rosi-Marshall EJ, Royer TV. (2012) Pharmaceutical compounds and ecosystem  
376 function: an emerging research challenge for aquatic ecologists. *Ecosystems*.  
377 15:867-880.
- 378 Ruhí A, Acuña A, Barceló D, Huerta B, Mor J-, Rodríguez-Mozaz S, Sabater S.  
379 (2016) Bioaccumulation and trophic magnification of pharmaceuticals and endocrine  
380 disruptors in a Mediterranean river food web. *Science of the Total Environment*  
381 540:250-259.
- 382 Shah PAL, Marshall-Batty KR, Smolen JA, Tagaev JA, Chen Q, Rodesney CA, Le  
383 HH, Gordon VD, Greenberg DE, Cannon CL. (2018) Antimicrobial Activity of  
384 Ibuprofen against Cystic Fibrosis-Associated Gram-Negative Pathogens.  
385 *Antimicrobial Agents and Chemotherapy* 62:e01574-17.
- 386 Stumpe B, Marschner B. (2009) Factors controlling the biodegradation of 17 $\beta$ -  
387 estradiol, estrone and 17 $\alpha$ -ethinylestradiol in different natural soils. *Chemosphere*  
388 74:556-562.

- 389 Van Boeckel TP, Gandra S, Ashok A, Caudron Q, Grenfell BT, Levin SA,  
390 Laxminarayan R. (2014) Global antibiotic consumption 2000 to 2010: an analysis of  
391 national pharmaceutical sales data. *Lancet Infectious Diseases* 14:742-750.
- 392 Wickham H. (2016) *ggplot2: Elegant Graphics for Data Analysis*. Springer-Verlag  
393 New York.
- 394 Writer JH, Ryan JN, Keefe SH, Barb LB. (2012) Fate of 4-Nonylphenol and 17 $\beta$ -  
395 Estradiol in the Redwood River of Minnesota. *Environmental Science & Technology*  
396 46:860-868.
- 397 Ylla I, Romaní AM, Sebater S. (2012) Labile and Recalcitrant Organic Matter  
398 Utilization by River Biofilm Under Increasing Water Temperature. *Microbial Ecology*  
399 64:593-604.
- 400 Zhang X, Li Y, Liu B, Wang J, Feng C. (2014) The effects of estrone and 17 $\beta$ -  
401 estradiol on microbial activity and bacterial diversity in an agricultural soil:  
402 sulfamethoxazole as a co-pollutant. *Ecotoxicology and Environmental Safety*  
403 107:313-320.
- 404 Żur J, Piński A, Marchlewicz A, Hupert-Kocurek K, Wojcieszńska D, Guzik U.  
405 (2018) Organic micropollutants paracetamol and ibuprofen: toxicity, biodegradation,  
406 and genetic background of their utilization by bacteria. *Environmental Science and*  
407 *Pollution Research* 25:21498-21524.
- 408 Zuur AF, Ieno EN, Elphick CS. (2010) A protocol for data exploration to avoid  
409 common statistical problems. *Methods Ecology and Evolution*. 1:3-14.



410 **Table**

411 Table 1. ANOVA summary tables of the effects of Ibuprofen and 17 $\alpha$ -ethynylestradiol  
 412 [EE2] upon a) biomass (ash free dry weight), b) respiration, c) Net Primary  
 413 Production and d) Gross Primary Production of cultured streambed biofilms.  
 414

| a) Biomass (Ash Free Dry Weight) |      |         |         |       |                  |
|----------------------------------|------|---------|---------|-------|------------------|
|                                  | Df   | SS      | MS      | F     | <i>p</i>         |
| Ibuprofen                        | 1    | 0.001   | 0.00086 | 0.008 | 0.931            |
| EE2                              | 1    | 0.006   | 0.00586 | 0.051 | 0.822            |
| Ibuprofen : EE2                  | 1    | 0.151   | 0.15142 | 1.331 | 0.256            |
| Residuals                        | 36   | 4.097   | 0.11379 |       |                  |
| b) Respiration                   |      |         |         |       |                  |
|                                  | Df   | SS      | MS      | F     | <i>p</i>         |
| Ibuprofen                        | 1    | 6482    | 6482    | 41.13 | <b>&lt;0.001</b> |
| EE2                              | 1    | 5085    | 5085    | 32.26 | <b>&lt;0.001</b> |
| Ibuprofen : EE2                  | 1    | 2952    | 2952    | 18.73 | <b>&lt;0.001</b> |
| Residuals                        | 36   | 5674    | 158     |       |                  |
| c) Net Primary Production        |      |         |         |       |                  |
|                                  | Df   | SS      | MS      | F     | <i>p</i>         |
| Ibuprofen                        | 1    | 7546    | 7545.8  | 7.483 | <b>0.009</b>     |
| EE2                              | 1    | 408     | 408.1   | 0.405 | 0.528            |
| Ibuprofen : EE2                  | 1    | 38      | 38.2    | 0.038 | 0.847            |
| Residuals                        | 36   | 36303   | 1008.4  |       |                  |
| d) Gross Primary Production      |      |         |         |       |                  |
|                                  | Df   | SS      | MS      | F     | <i>p</i>         |
| Ibuprofen                        | 1    | 931.5   | 931.46  | 1.737 | 0.196            |
| EE2                              | 1    | 1201.0  | 1200.96 | 2.240 | 0.143            |
| Ibuprofen : EE2                  | 1    | 1607.4  | 1607.40 | 2.998 | 0.092            |
| Residuals                        | 36 b | 19300.8 | 536.13  |       |                  |

415  
 416

417 **Figures**

418 Figure 1. Effects of Ibuprofen (♂) and 17 $\alpha$ -ethynylestradiol (♀) upon the (A) biomass  
419 (ash free dry weight), (B) respiration and (C) Net Primary Production and (D) Gross  
420 Primary Production of cultured streambed biofilms. Significance levels: \*\*\* $p < 0.001$ ;  
421 \*\* $p < 0.01$ ; \* $p < 0.05$ ; N/S  $p > 0.05$ . Where significant interactions were identified,  
422 groups labelled with the same lowercase letter are not significantly different ( $p >$   
423 0.05; Tukey's tests).

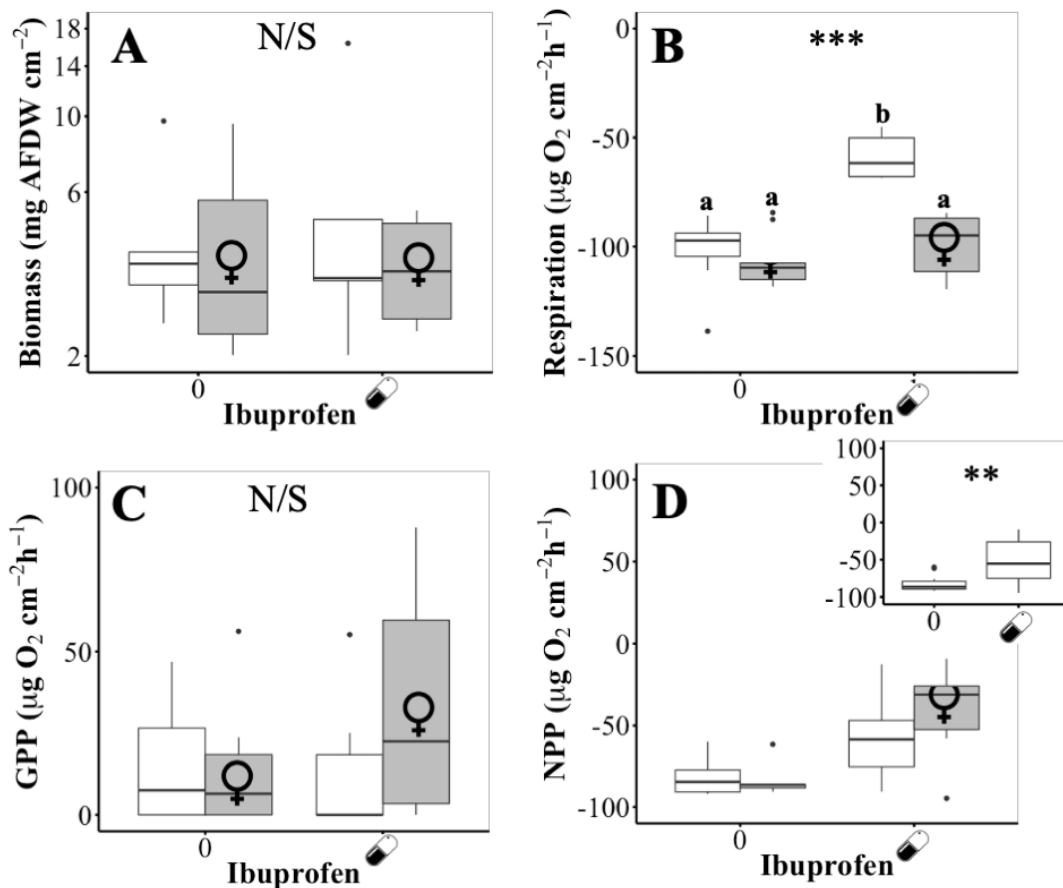

424

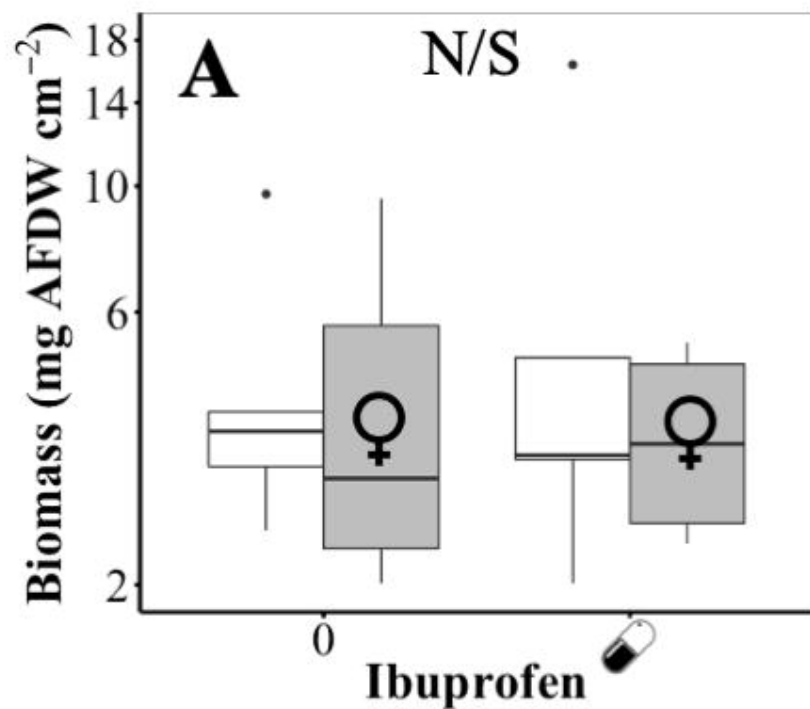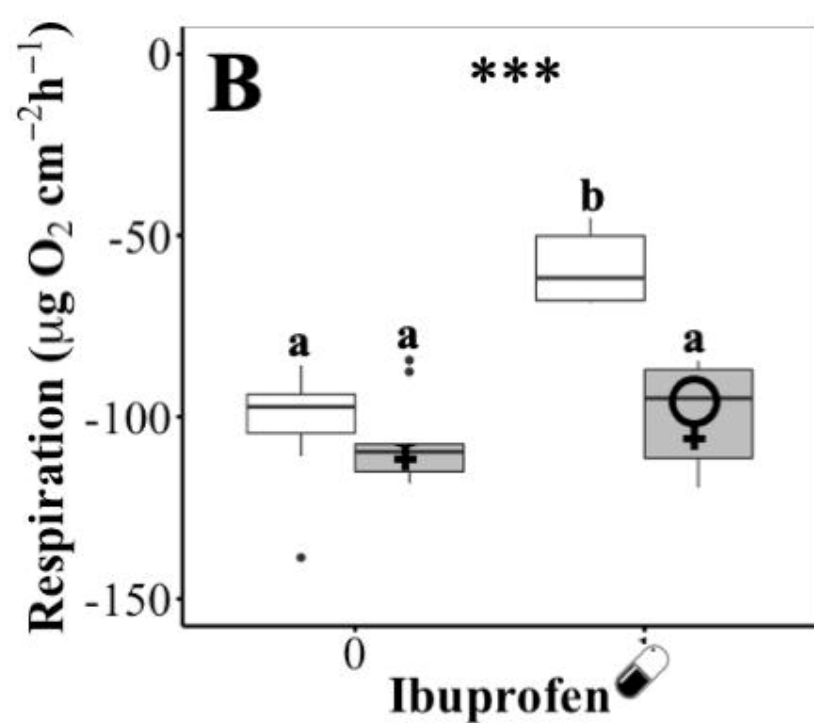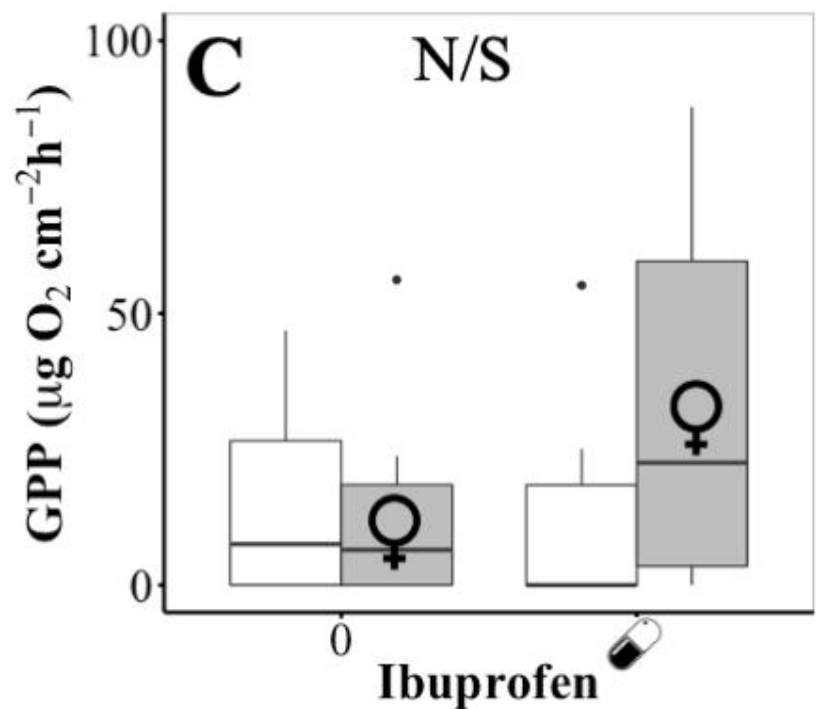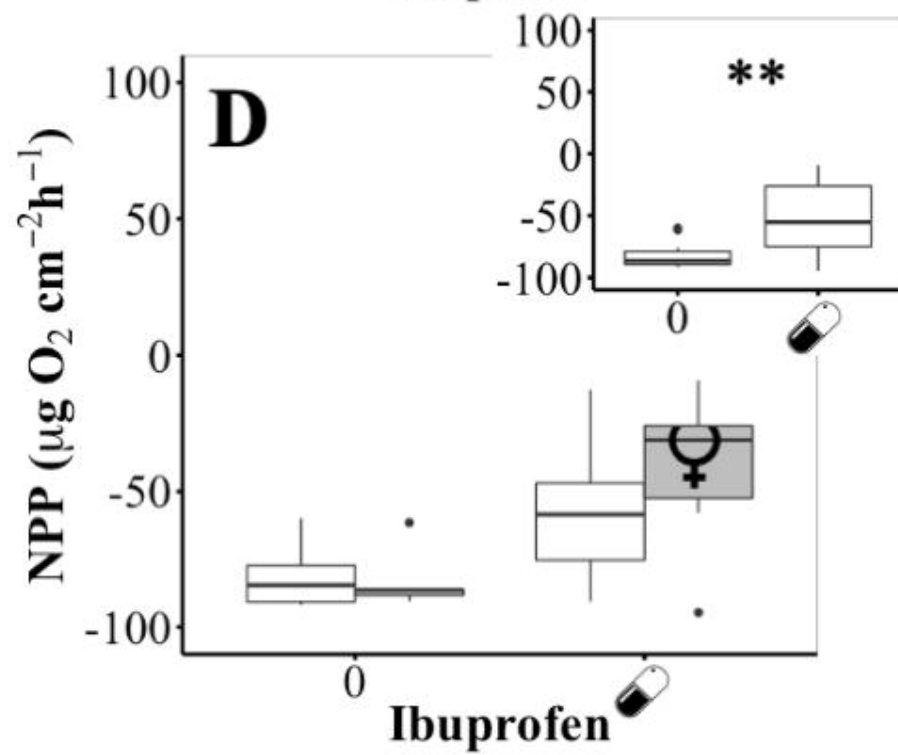

Source: https://www.biorxiv.org/content/10.1101/718924v3.full.pdf
